# Supplementary material for: Ce4+/Ce3+ redox-controlled luminescence ‘off/on’ switching of highly oriented Ce(OH)2Cl and Tb-doped Ce(OH)2Cl films
Source: Royal Society of Chemistry journal article supplement (doi:10.1039/c6tc04539a), 2016-12-05
Supplement: c6tc04539a1.pdf [file c6tc04539a1.pdf]

## Electronic Supplementary Information

### **Ce<sup>4+</sup>/Ce<sup>3+</sup> Redox-Controlled Luminescence ‘Off/On’ Switching of Highly Oriented Ce(OH)<sub>2</sub>Cl and Tb-doped Ce(OH)<sub>2</sub>Cl Films**

Hyunsub Kim, Minhee Kim and Song-Ho Byeon\*

*Department of Applied Chemistry, College of Applied Science and Institute of Natural Sciences, Kyung Hee University, Gyeonggi 17104, Korea*

*E-mail: shbyun@khu.ac.kr*

*J. Mater. Chem. C*

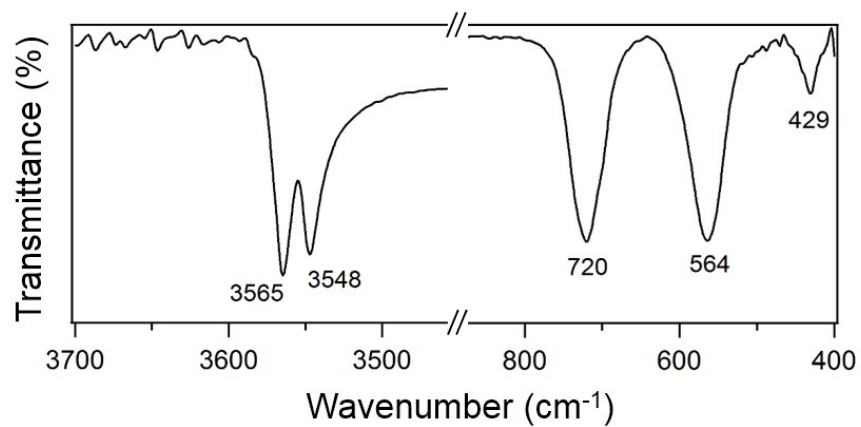

**Fig. S1** FT-IR spectra of  $\text{Ce}(\text{OH})_2\text{Cl}$ .

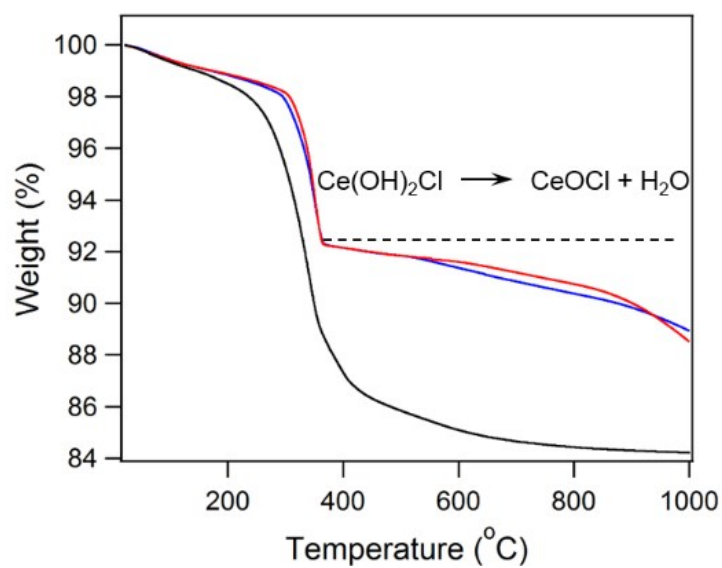

**Fig. S2** Thermogravimetric curves of  $\text{Ce}(\text{OH})_2\text{Cl}$  under air (black),  $\text{N}_2$  (red), and Ar gas (red) flowing.

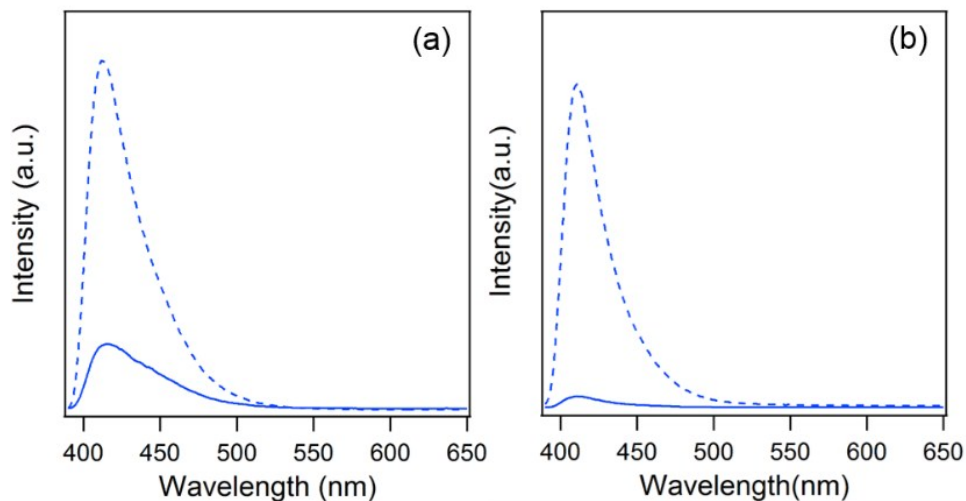

**Fig. S3** Comparison of emission spectra ( $\lambda_{\text{ex}} = 312$  nm) of  $\text{Ce}(\text{OH})_2\text{Cl}$  films deposited on (a) common quartz glass and (b) FTO glass before (dotted line) and after (solid line) the oxidation reaction in 10.0 mM aqueous  $\text{KMnO}_4$  solution for 5 min.

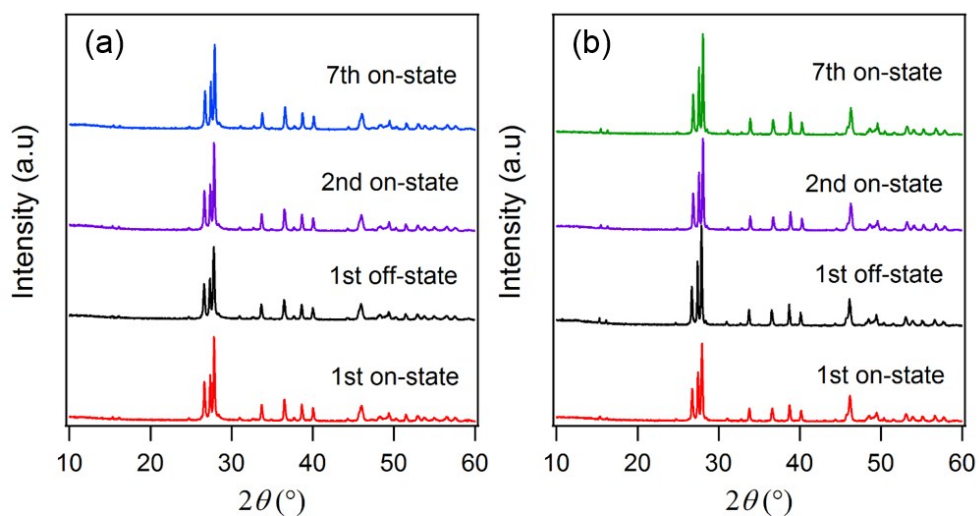

**Fig. S4** XRD patterns of (a)  $\text{Ce}(\text{OH})_2\text{Cl}$  and (b)  $\text{Ce}(\text{OH})_2\text{Cl}:\text{Tb}$  films on FTO glass as a function of the ‘off/on’ switching cycle.

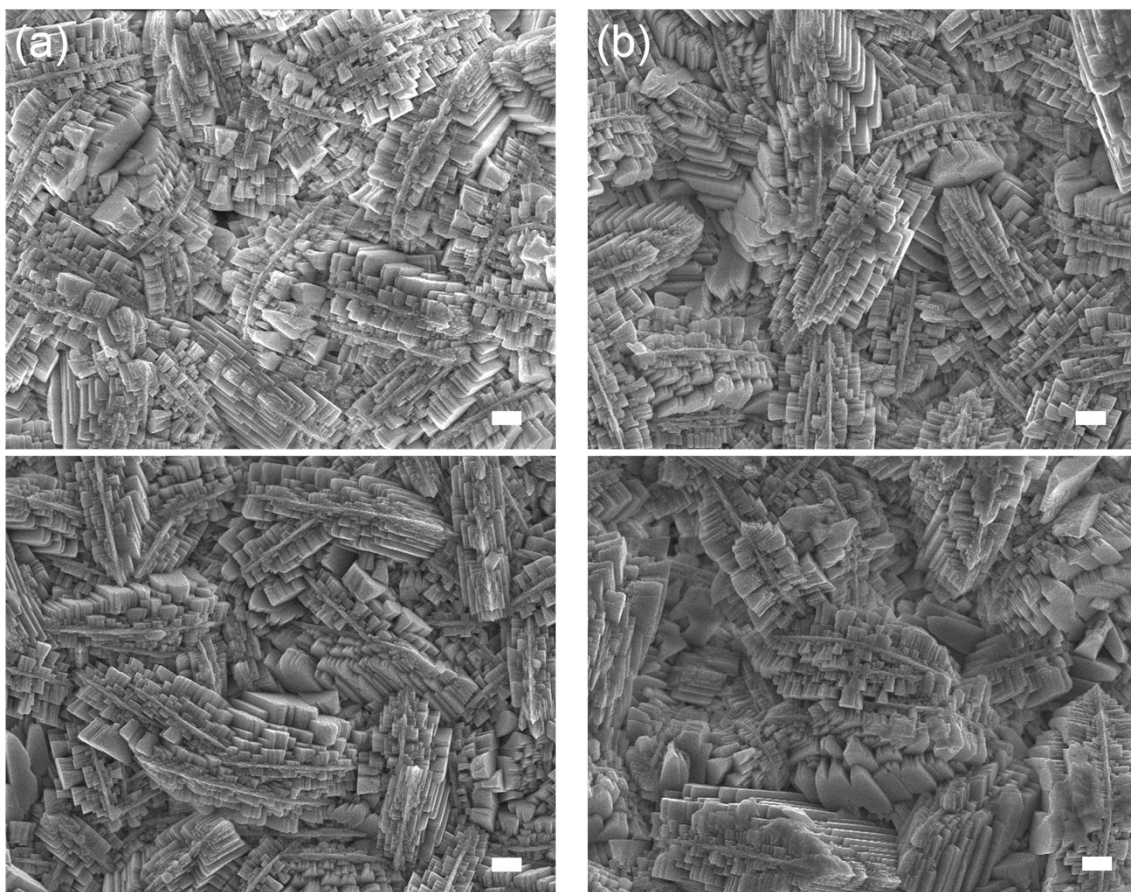

**Fig. S5** SEM images of (a)  $\text{Ce(OH)}_2\text{Cl}$  and (b)  $\text{Ce(OH)}_2\text{Cl:Tb}$  films on FTO glass before (top) and after (bottom) six cycles of oxidation and reduction. (bar = 1  $\mu\text{m}$ )
